# Supplementary material for: Comparison of Summer and Winter Objectively Measured Physical Activity and Sedentary Behavior in Older Adults: Age, Gene/Environment Susceptibility Reykjavik Study
Source: MDPI journal article supplement (doi:10.3390/ijerph14101268), 2017-10-21
Supplement: s1 [file s1]

**Figure S1.** Flow chart for the study population.

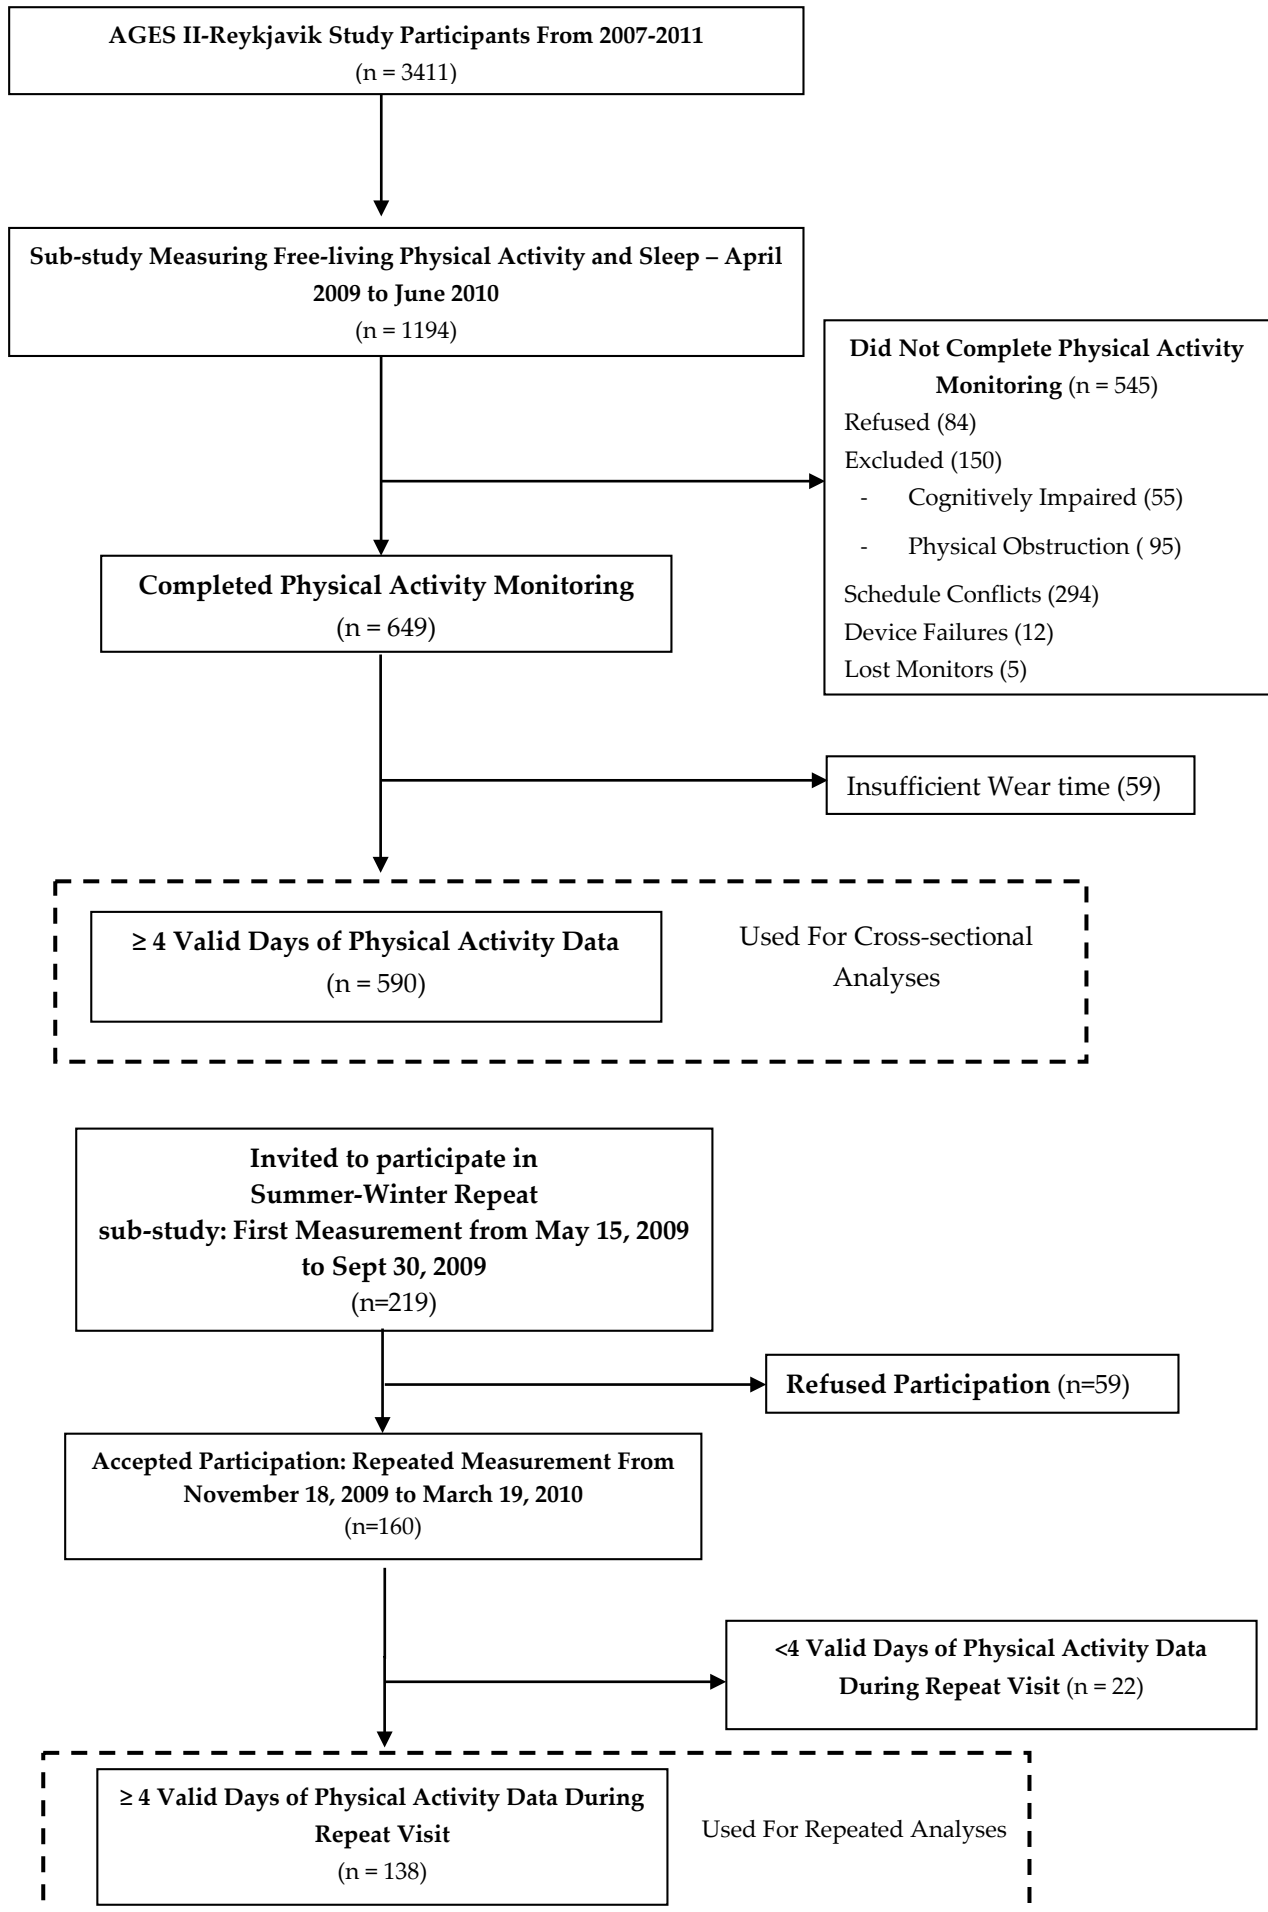

**Table S1.** Results of backward-elimination, linear regression of cross-sectional PA and SB parameters for the AGESII cohort. Covariates included age, sex, BMI, self-reported health status, day length, and temperature. Data are presented as standardized Beta. A negative standardized Beta ( $\beta$ ) value indicates an inverse relationship.

| Variables          | Temperature/Day length |              | Age                 |                                     | Female                               |                                     | BMI                                  |       | Health status |       |
|--------------------|------------------------|--------------|---------------------|-------------------------------------|--------------------------------------|-------------------------------------|--------------------------------------|-------|---------------|-------|
|                    | $\beta$                | 95%CI        | $\beta$             | 95%CI                               | $\beta$                              | 95%CI                               | $\beta$                              | 95%CI | $\beta$       | 95%CI |
| WT-SB <sup>a</sup> | Temperature            | <b>-0.10</b> | <b>-0.17; -0.02</b> |                                     |                                      |                                     |                                      |       |               |       |
|                    | Day length             |              |                     | <b>0.31</b><br><b>0.23; 0.38</b>    | <b>-0.15</b><br><b>-0.23; -0.08</b>  | <b>0.11</b><br><b>0.03; 0.19</b>    | <b>0.10</b><br><b>0.01; 0.17</b>     |       |               |       |
| TPA <sup>b</sup>   | Temperature            | <b>0.10</b>  | <b>0.03; 0.17</b>   | <b>-0.37</b><br><b>-0.45; -0.30</b> | <b>-0.04</b><br><b>-0.11; 0.04</b>   |                                     |                                      |       |               |       |
|                    | Day length             |              |                     |                                     |                                      | <b>-0.14</b><br><b>-0.22; -0.06</b> | <b>-0.11</b><br><b>-0.18; -0.03</b>  |       |               |       |
| LIPA <sup>b</sup>  | Temperature            |              |                     |                                     |                                      |                                     |                                      |       |               |       |
|                    | Day length             | 0.06         | -0.02; 0.13         | <b>-0.29</b><br><b>-0.36; -0.21</b> | 0.19<br>0.11; 0.26                   | <b>-0.09</b><br><b>-0.17; -0.01</b> | <b>-0.09</b><br><b>-0.16; -0.002</b> |       |               |       |
| LSPA <sup>b</sup>  | Temperature            | <b>0.11</b>  | <b>0.038; 0.19</b>  | <b>-0.36</b><br><b>-0.43; -0.28</b> | <b>-0.08</b><br><b>-0.16; -0.006</b> |                                     |                                      |       |               |       |
|                    | Day length             |              |                     |                                     |                                      | <b>-0.11</b><br><b>-0.19; -0.03</b> | <b>-0.12</b><br><b>-0.19; -0.04</b>  |       |               |       |
| MVPA <sup>b</sup>  | Temperature            | 0.05         | -0.02; 0.13         | <b>-0.29</b><br><b>-0.37; -0.21</b> | <b>-0.21</b><br><b>-0.29; -0.14</b>  |                                     |                                      |       |               |       |
|                    | Day length             |              |                     |                                     |                                      | <b>-0.18</b><br><b>-0.25; -0.10</b> | <b>-0.10</b><br><b>-0.17; -0.02</b>  |       |               |       |

WT= Wear time; SD= standard deviation, day to day variation in each PA/SB variable; PA= Physical activity; SB= Sedentary behavior; TPA= Total PA; LIPA= Low-intensity PA (100-759 counts  $\times$  min<sup>-1</sup>); LSPA= Lifestyle PA ( $\geq 760$  counts  $\times$  min<sup>-1</sup>); MVPA= Moderate-to-vigorous PA ( $\geq 2020$  counts  $\times$  min<sup>-1</sup>); <sup>a</sup>= adjusted for wear time; <sup>b</sup>= square root transformed.
